# Supplementary material for: Genetic counselling legislation and practice in cancer in EU Member States
Source: PubMed Central journal article supplement (PMC11293827; doi:10.1093/eurpub/ckae093), 2024-06-21
Supplement: ckae093_supplementary_data.pdf [file ckae093_supplementary_data.pdf]

## **Genetic counselling legislation and practice in cancer in EU Member States**

Authors: J. Matt McCrary, Els Van Valckenborgh, H  l  ne A. Poirel, Robin de Putter, Jeroen van Rooij, Denis Horgan, Marie-Luise Dierks, Olga Antonova, MD, Joan Brunet, MD, Adela Chirita-Emandi, Chrystelle Colas, Miriam Dalmas, Hans Ehrencrona, Claire Grima, Ram  nas Janavi  ius, Barbara Klink, Katalin Koczok, Mateja Krajc, Baiba Lace, Liis Leitsalu, Martin Mistrik, Milena Panenque, Dragan Primorac, Katharina M. Roetzer, Joelle Ronez, Lucie Sl  mov  , Elena Spanou, Kostas Stamatopoulos, Tomasz Stoklosa, Sonja Strang-Karlsson, Katalin Szakszon, Krzysztof Szcza  uba, Jacqueline Turner, Marieke F. van Dooren, Wendy A.G. van Zelst-Stams, Loredana-Maria Vassalo, Karin A.W. Wadt, Tamara   igman, Tim Ripperger, Maurizio Genuardi, Marc van den Bulcke, Anke Katharina Bergmann

### *Supplementary Tables*

#### Table of Contents

|                                    |                |
|------------------------------------|----------------|
| <b>Supplementary Table 1</b> ..... | <b>Page 2</b>  |
| <b>Supplementary Table 2</b> ..... | <b>Page 3</b>  |
| <b>Supplementary Table 3</b> ..... | <b>Page 4</b>  |
| <b>Supplementary Table 4</b> ..... | <b>Page 6</b>  |
| <b>Supplementary Table 5</b> ..... | <b>Page 10</b> |

| Member State   | Legislation Database URL                                                                                      |
|----------------|---------------------------------------------------------------------------------------------------------------|
| Austria        | <a href="https://www.ris.bka.gv.at/">https://www.ris.bka.gv.at/</a>                                           |
| Belgium        | <a href="http://www.ejustice.just.fgov.be/cgi/welcome.pl">http://www.ejustice.just.fgov.be/cgi/welcome.pl</a> |
| Bulgaria       | <a href="https://www.lex.bg/">https://www.lex.bg/</a>                                                         |
| Croatia        | <a href="https://narodne-novine.nn.hr/search.aspx">https://narodne-novine.nn.hr/search.aspx</a>               |
| Cyprus         | <a href="http://www.cylaw.org/">http://www.cylaw.org/</a>                                                     |
| Czech Republic | <a href="http://zakony-online.cz/">http://zakony-online.cz/</a>                                               |
| Denmark        | <a href="https://www.retsinformation.dk/">https://www.retsinformation.dk/</a>                                 |
| Estonia        | <a href="https://www.riigiteataja.ee/">https://www.riigiteataja.ee/</a>                                       |
| Finland        | <a href="https://finlex.fi/fi/">https://finlex.fi/fi/</a>                                                     |
| France         | <a href="https://www.legifrance.gouv.fr/">https://www.legifrance.gouv.fr/</a>                                 |
| Germany        | <a href="https://www.bgbl.de/">https://www.bgbl.de/</a>                                                       |
| Greece         | <a href="http://www.et.gr/">http://www.et.gr/</a>                                                             |
| Hungary        | <a href="http://mkogy.jogtar.hu/">http://mkogy.jogtar.hu/</a>                                                 |
| Ireland        | <a href="http://www.irishstatutebook.ie/">http://www.irishstatutebook.ie/</a>                                 |
| Italy          | <a href="http://www.normattiva.it/">http://www.normattiva.it/</a>                                             |
| Latvia         | <a href="https://likumi.lv/">https://likumi.lv/</a>                                                           |
| Lithuania      | <a href="https://www.e-tar.lt/">https://www.e-tar.lt/</a>                                                     |
| Luxembourg     | <a href="http://legilux.public.lu/">http://legilux.public.lu/</a>                                             |
| Malta          | <a href="http://justiceservices.gov.mt/">http://justiceservices.gov.mt/</a>                                   |
| Netherlands    | <a href="http://wetten.overheid.nl/">http://wetten.overheid.nl/</a>                                           |
| Poland         | <a href="http://isap.sejm.gov.pl/">http://isap.sejm.gov.pl/</a>                                               |
| Portugal       | <a href="http://www.pgdlisboa.pt/home.php">http://www.pgdlisboa.pt/home.php</a>                               |
| Romania        | <a href="http://legislatie.just.ro/">http://legislatie.just.ro/</a>                                           |
| Slovakia       | <a href="https://www.slov-lex.sk/">https://www.slov-lex.sk/</a>                                               |
| Slovenia       | <a href="http://www.pisrs.si/">http://www.pisrs.si/</a>                                                       |
| Spain          | <a href="http://www.boe.es/">http://www.boe.es/</a>                                                           |
| Sweden         | <a href="http://www.riksdagen.se/sv/dokument-lagar/">http://www.riksdagen.se/sv/dokument-lagar/</a>           |

**Supplementary Table 1.** National legislation databases searched in review Phase 1. Sourced from Angers A, Bohacova A, Kaye J, et al. (2018) Overview of EU national legislation on genomics. URL: <https://op.europa.eu/en/publication-detail/-/publication/503c92f7-ff55-11e8-a96d-01aa75ed71a1>

|                  |                                                                                                                                                                                                                                                                                                                                                                                                                                                                           |
|------------------|---------------------------------------------------------------------------------------------------------------------------------------------------------------------------------------------------------------------------------------------------------------------------------------------------------------------------------------------------------------------------------------------------------------------------------------------------------------------------|
| <b>Who</b>       | <ul style="list-style-type: none"> <li>- Who is able to and/or typically provides genetic counselling services?</li> <li>- Who is allowed to order (predictive/diagnostic) germline and somatic testing?</li> <li>- Is ‘medical/clinical genetics’ a sub-specialization in the medical field?</li> <li>- Approximately how many ‘geneticists’ are in &lt;country&gt;?</li> <li>- Do genetic counsellors exist as a separate group of healthcare professionals?</li> </ul> |
| <b>What</b>      | <ul style="list-style-type: none"> <li>- Is the content of genetic counselling sessions regulated or prescribed?</li> <li>- How are genetic counselling sessions integrated into the clinical setting (i.e. flow of information and referrals)?</li> <li>- How are literacy issues addressed for patients and/or non-geneticist clinicians?</li> </ul>                                                                                                                    |
| <b>When</b>      | <ul style="list-style-type: none"> <li>- When are genetic counselling sessions typically provided?</li> <li>- Are there any requirements and/or restrictions governing when genetic counselling sessions are delivered?</li> <li>- Are clinician reimbursement frameworks a barrier to genetic counselling delivery?</li> </ul>                                                                                                                                           |
| <b>Where/How</b> | <ul style="list-style-type: none"> <li>- Are telemedical genetic counselling sessions possible and/or used?</li> <li>- If yes, can you estimate a rough proportion of in-person vs. telemedical genetic counselling?</li> <li>- Are there any other requirements and/or restrictions governing where and how genetic counselling sessions can be delivered?</li> </ul>                                                                                                    |

**Supplementary Table 2.** Guiding questions for semi-structured interview with expert representatives from each Member State.

| Member State   | National Legislation                                                                                                                                                                                                                                                                                            | Where defined in legislation |                            |                              | Additional Notes                                                                                                                                                              |
|----------------|-----------------------------------------------------------------------------------------------------------------------------------------------------------------------------------------------------------------------------------------------------------------------------------------------------------------|------------------------------|----------------------------|------------------------------|-------------------------------------------------------------------------------------------------------------------------------------------------------------------------------|
|                |                                                                                                                                                                                                                                                                                                                 | Who                          | What                       | When                         |                                                                                                                                                                               |
| Austria        | Gene Technology Act (1994)                                                                                                                                                                                                                                                                                      | Article 69, paragraph 1      | Article 69, paragraphs 3-6 | Article 69, paragraphs 3 & 4 | -                                                                                                                                                                             |
| Belgium        | Agreement between the medical care insurance committee and the centres for human heredity for benefits in kind concerning genetic disorders: Genetic counselling, DNA tests carried out abroad (2011) – <i>implementing</i> : Law 14/7/1994 Compulsory Health Care and Indemnity Insurance Act, Article 22, 18° | Articles 10-14               | Article 1, Sections 1-3    | Article 1, section 2         | Article 6 defines 'where' genetic counselling may be performed: Centre of Human Genetics, or hospital/care facility with formalized cooperation with Centre of Human Genetics |
| Bulgaria       | Health Law (2005)                                                                                                                                                                                                                                                                                               | -                            | -                          | -                            | Article 140, paragraph 1 references specific informed consent provisions for genetic tests                                                                                    |
| Croatia        | Law on the Protection of Patients' Rights (2008)                                                                                                                                                                                                                                                                | -                            | -                          | -                            | Article 22 references need for appropriate genetic counselling accompanying genetic tests                                                                                     |
| Czech Republic | Act 373/2011 Coll. on Specific Health Care Services (2011)                                                                                                                                                                                                                                                      | Article 28, paragraph 6      | Article 28, paragraph 4a   | Article 28, paragraph 6      | -                                                                                                                                                                             |
| Denmark        | Amendment of the Healthcare Law, 27/01/2022                                                                                                                                                                                                                                                                     | -                            | -                          | -                            | Section 29a references specific informed consent provisions for genetic tests                                                                                                 |
| France         | Law no. 2021-1017 of August 2, 2021 on Bioethics                                                                                                                                                                                                                                                                | Section 32                   | Sections 15 & 16           | Sections 14 & 15             | -                                                                                                                                                                             |
| Germany        | Gene Diagnostics Law (2009)                                                                                                                                                                                                                                                                                     | Section 7, paragraphs 1 & 3  | Section 10, paragraph 3    | Section 10, paragraphs 2 & 3 | -                                                                                                                                                                             |

|             |                                                                |                            |                         |                                |                                                                                                        |
|-------------|----------------------------------------------------------------|----------------------------|-------------------------|--------------------------------|--------------------------------------------------------------------------------------------------------|
| Hungary     | Parliamentary Act No XXI                                       | Section 3, definition m    | Section 3, definition m | Section 6, paragraphs 2 & 4    | -                                                                                                      |
| Ireland     | Disability Act (2005)                                          | -                          | Section 42, paragraph 3 | Section 42, paragraph 3        | -                                                                                                      |
| Latvia      | Human Genome Research Act (2004)                               | -                          | -                       | -                              | Chapter II establishes principles of informed consent related to gene donors in genetic research       |
| Luxembourg  | Nomenclature Law (2014)                                        | Section 10                 | Section 10              | Section 10, paragraphs a-f & i | -                                                                                                      |
| Luxembourg  | Hospital Law (2018)                                            | -                          | -                       | -                              | Article 6, paragraph 3 specifies that genetic counselling is managed by the National Health Laboratory |
| Netherlands | Special Medical Procedures Act (2018)                          | Article 1.h                | -                       | -                              | -                                                                                                      |
| Portugal    | Personal Genetic Information and Health Information Act (2005) | Article 9, sentences 2 & 3 | -                       | Article 9, sentences 2 & 8     | -                                                                                                      |
| Slovenia    | Criminal Code                                                  | -                          | -                       | Article 114, section 3         | -                                                                                                      |
| Spain       | Law 14/2007, of 3 July, on Biomedical Research                 | -                          | Article 3, section e    | Article 3, section e           | -                                                                                                      |
| Sweden      | Genetic Integrity Act (2006)                                   | -                          | -                       | -                              | Chapter 4, section 1 alludes to a procedure analogous to genetic counselling for prenatal diagnostics  |

**Supplementary Table 3.** Details of genetic counselling inclusion in national legislation in EU Member States.

| Member State | National Regulation                                                                                                                                                     | Where defined in regulation |                            |                            | Additional Notes                                                                                         |
|--------------|-------------------------------------------------------------------------------------------------------------------------------------------------------------------------|-----------------------------|----------------------------|----------------------------|----------------------------------------------------------------------------------------------------------|
|              |                                                                                                                                                                         | Who                         | What                       | When                       |                                                                                                          |
| Austria      | Quality Standard for Genetic Counselling and Diagnostics (2015)                                                                                                         | Sections 3.1 & 3.2          | Sections 3.1 & 3.2         | Sections 3.1 & 3.2         | -                                                                                                        |
| Belgium      | Royal Decree establishing the standards to be met by centers for human genetics (1987)                                                                                  | -                           | Article 6, paragraphs 1-3  | -                          | --                                                                                                       |
| Belgium      | Ministerial Decree establishing special criteria for recognition of physician specialists, internship masters, and internship services in clinical genetics (2017)      | Appendix 1.4                | -                          | -                          | -                                                                                                        |
| Bulgaria     | Medical Standards for Medical Genetics (2011)                                                                                                                           | Article II, section 1       | Article II, sections 4 & 5 | Article II, sections 4 & 5 | Section 2.1.1 also defines physical characteristics of office where genetic counselling can be conducted |
| France       | Order of 27 May 2013 defining the rules of good practice applicable to the examination of a person's genetic characteristics for medical purposes                       | Section 2.2                 | Sections 3.1 & 3.2         | Section 4.2                | -                                                                                                        |
| France       | Decree no. 2022-1488 of November 29, 2022 on the conditions for prescribing certain medical biology examinations and communicating their results by genetic counsellors | Whole document              | -                          | -                          | -                                                                                                        |
| Hungary      | Directive of the Ministry of Human Resources on genetic counselling, ID: 002092 (2020)                                                                                  | IV/1.                       | IV/1.                      | IV/1.                      |                                                                                                          |

|             |                                                                                                                                                           |                   |            |                  |                                                                                                                                                                                              |
|-------------|-----------------------------------------------------------------------------------------------------------------------------------------------------------|-------------------|------------|------------------|----------------------------------------------------------------------------------------------------------------------------------------------------------------------------------------------|
| Italy       | General Authorisation No. 8/2014 for the Processing of Genetic Data (2014)                                                                                | Sections 1h & 5.1 | Section 1h | Section 5.1      | -                                                                                                                                                                                            |
| Italy       | Guidelines for Medical Genetics (2004)                                                                                                                    | Section 2         | Section 2  | Section 2        | Section 5.2 specifies role for medical geneticists in improving genetic literacy of population                                                                                               |
| Latvia      | Regulation No. 555, Adopted 28 August 2018 – Procedures for the Organization of and Payment for Health Care Service under Medical Treatment Law (1997)    | -                 | -          | Sections 74 – 75 | -                                                                                                                                                                                            |
| Lithuania   | Order of the Ministry of Health V-745 (2012)                                                                                                              | Sections 5 & 17   | -          | -                | Sections 7-12 also defines physical characteristics of office where genetic counselling can be conducted                                                                                     |
| Lithuania   | Order of the Ministry of Health V-1458 (2014)                                                                                                             | Section 3         | -          | Section 3        | -                                                                                                                                                                                            |
| Netherlands | Planning Decision on Clinical Genetic Research and Genetic Counselling (1998)                                                                             | Section 3.1       | -          | -                | Section 2 restricts delivery of genetic counselling to 8 centres of clinical genetics; section 3.5 specifies role of medical genetics centres in educating non-genetics health professionals |
| Poland      | Order of the Minister of Health of 21 <sup>st</sup> July 2022 amending the Regulation on guaranteed benefits in the field of ambulatory care for families | Section 1         | Section 1  | Section 1        |                                                                                                                                                                                              |

|          |                                                                                                                                                                                                                                                                            |                           |                           |               |                                                                                                                                                                                                                                     |
|----------|----------------------------------------------------------------------------------------------------------------------------------------------------------------------------------------------------------------------------------------------------------------------------|---------------------------|---------------------------|---------------|-------------------------------------------------------------------------------------------------------------------------------------------------------------------------------------------------------------------------------------|
|          | with high risk of hereditary cancer                                                                                                                                                                                                                                        |                           |                           |               |                                                                                                                                                                                                                                     |
| Portugal | Order of the Ministry of Health #5411/97 (1997)                                                                                                                                                                                                                            | Section 3                 | -                         | -             | -                                                                                                                                                                                                                                   |
|          | Establishment of the Medical Genetics Network (2014)                                                                                                                                                                                                                       | Annex 3                   | -                         | -             | Annex 4 specifies health education for professionals and the public as regional medical centre duty                                                                                                                                 |
|          | Order no. 774 of September 18, 2023                                                                                                                                                                                                                                        | -                         | -                         | -             | Introduces National Genetic Testing Subprogram, broadly improving clinical integration of genetics                                                                                                                                  |
| Romania  | Appendices no. 1 and 2 to Government Decision no. 521/2023 for approval of the service packages and the framework contract that regulates the conditions for the provision of medical assistance, medicines and medical devices, within the social health insurance system | Chapter II, Section B 1.8 | Chapter II, section B 1.7 | -             | Section B 1.7 and 1.8 specify that genetic counseling is reimbursed as a service in outpatient care. Psychological counselling can also be added to genetic counselling (as connected services)                                     |
| Slovakia | The Concept of Healthcare in the Field of Medical Genetics (2014)                                                                                                                                                                                                          | Whole document            | Section 1.2.4             | Section 1.2.4 | Sections 1.1 & 2.3 specify role of medical genetics departments to provide health education of the population by medical genetics departments; Section 3 extends this directive to the continuing education of other health workers |

**Supplementary Table 4.** Details of genetic counselling inclusion in national regulations in EU Member States.



| Country  | Who                                                                                                                                                                                                                                                          |                                                                   | Is genetics a clinical specialty?      |                                                         | Are genetic counsellors recognized?                                                |                                                                                                            | What                    | When                             | Where/How                                                                                                                                                   | Frequency of telemedical counselling | Reimbursement barriers to counselling |
|----------|--------------------------------------------------------------------------------------------------------------------------------------------------------------------------------------------------------------------------------------------------------------|-------------------------------------------------------------------|----------------------------------------|---------------------------------------------------------|------------------------------------------------------------------------------------|------------------------------------------------------------------------------------------------------------|-------------------------|----------------------------------|-------------------------------------------------------------------------------------------------------------------------------------------------------------|--------------------------------------|---------------------------------------|
|          | Provides genetic counselling                                                                                                                                                                                                                                 | Allowed to order germline tests                                   | Yes                                    | No                                                      | Guides counselling content                                                         | Is genetic counselling provided                                                                            | Telemedical counselling |                                  |                                                                                                                                                             |                                      |                                       |
| Austria  | Typically, medical geneticists; possible by any specialized medical doctor in his/her field                                                                                                                                                                  | Any specialized medical doctor for tests related to his/her field | Yes                                    | No                                                      | National Legislation & Regulation                                                  | Mandatory pre- and post-test                                                                               | Possible                | <5-10% of all counselling        | Counselling only reimbursed when delivered by centers of medical genetics; no reimbursement for individual doctors                                          |                                      |                                       |
| Belgium  | Covered by insurance convention (most scenarios): multidisciplinary team (including clinical geneticists, psychologists, social workers, and genetic counsellors); possible by all physicians/affiliated genetic counsellors in scenarios outside convention | Any medical doctor                                                | Yes                                    | No (but well-integrated into genetic services delivery) | Convention between insurance and clinical genetics centers; clinical best practice | Mandatory pre- and post-test (most scenarios); Typically pre- and post-test (scenarios outside convention) | Possible                | <5% of all counselling           | Counselling only full reimbursed when covered under convention; 12 EUR per consult co-pay for counselling performed outside convention (e.g. mainstreaming) |                                      |                                       |
| Bulgaria | Medical geneticists                                                                                                                                                                                                                                          | Medical geneticists & oncologists                                 | Yes                                    | No                                                      | National clinical practice standards (regulation)                                  | Mandatory pre- & post-test                                                                                 | Possible                | 'Relatively frequent'            | National insurance doesn't reimburse for counselling; provided for free or paid by patient in public system                                                 |                                      |                                       |
| Croatia  | Any medical doctor, but mostly with pediatricians                                                                                                                                                                                                            | Any medical doctor                                                | Yes (1 <sup>st</sup> intake of medical | No                                                      | Clinical practice best                                                             | Typically pre- & post-test                                                                                 | Possible                | Minority of counselling sessions | None                                                                                                                                                        |                                      |                                       |

|                |                                                                                                                                                                                             |                                                                 |     |                                                                                     |                                                        |                                             |                                 |                                       |                                                                                                                                          |
|----------------|---------------------------------------------------------------------------------------------------------------------------------------------------------------------------------------------|-----------------------------------------------------------------|-----|-------------------------------------------------------------------------------------|--------------------------------------------------------|---------------------------------------------|---------------------------------|---------------------------------------|------------------------------------------------------------------------------------------------------------------------------------------|
|                | genetics sub-specialization ( <i>medical genetics new specialty, 1<sup>st</sup> residents in 2023</i> )                                                                                     |                                                                 |     | <i>genetics residents in 2023</i> )                                                 |                                                        |                                             |                                 |                                       |                                                                                                                                          |
| Cyprus         | Typically, genetic counsellors; possible by any medical doctor                                                                                                                              | Any medical doctor                                              | Yes | No (but well-integrated into genetic services delivery)                             | Clinical practice best                                 | Typically pre- and post-test                | Not possible                    | -                                     | None                                                                                                                                     |
| Czech Republic | Medical geneticists                                                                                                                                                                         | Medical geneticists                                             | Yes | No                                                                                  | National legislation; clinical practice best           | Mandatory pre- and post-test                | Possible                        | Approx. 20% of all counselling        | None                                                                                                                                     |
| Denmark        | Smaller panels: any clinician + nurses; WGS: medical geneticist                                                                                                                             | Smaller panels: any clinician + nurses; WGS: medical geneticist | Yes | No                                                                                  | Principles of informed consent                         | Mandatory pre-test only; post-test possible | Possible                        | ‘Quite frequent’                      | None                                                                                                                                     |
| Estonia        | Medical geneticists; some aspects provided by nurses in specific scenarios                                                                                                                  | Any medical doctor                                              | Yes | No                                                                                  | Clinical practice best                                 | Typically pre- and post-test                | Possible – for recurrent visits | Minority of but in growing proportion | Lump sum amount to cover all genetic services for entire year; non-priority cases at end of year typically asked to wait until next year |
| Finland        | Typically medical geneticists, possible by any medical doctor; ‘unwritten rule’ that medical geneticists handle predictive testing; in certain situations, nurses with training in genetics | Any medical doctor                                              | Yes | No (but nurses with training in genetics integrated into genetic services delivery) | Clinical practice; principles of informed consent best | Typically pre- & post-test                  | Possible                        | >50% of all counselling               | None                                                                                                                                     |

|         |                                                                                                                                            |                                                                                                                                                                                                                             |     |                                            |                                                                     |                              |          |                                                                   |                                                                                                                                        |
|---------|--------------------------------------------------------------------------------------------------------------------------------------------|-----------------------------------------------------------------------------------------------------------------------------------------------------------------------------------------------------------------------------|-----|--------------------------------------------|---------------------------------------------------------------------|------------------------------|----------|-------------------------------------------------------------------|----------------------------------------------------------------------------------------------------------------------------------------|
| France  | Predictive: only medical geneticists or genetic counsellors;<br>Symptomatic: any medical doctor with additional genetics training          | Predictive: only medical geneticists or genetic counsellors;<br>Symptomatic: any medical doctor with additional genetics training                                                                                           | Yes | Yes                                        | National legislation & regulation                                   | Mandatory pre- & post-test   | Possible | Approx. 10% of all counselling                                    | National insurance reimbursement only ~50% of costs of prescribed genetic tests and counselling; hospital required to cover other ~50% |
| Germany | Clinical geneticists or specialist doctors with additional genetics qualification in field of primary expertise                            | Diagnostic scenario: any medical doctor; predictive scenario: clinical geneticists or specialist doctors with additional genetics qualification in field of primary expertise                                               | Yes | No (but sparsely working in health system) | National legislation                                                | Typically pre- & post-test   | Possible | Rarely used                                                       | No reimbursement of telemedical counselling                                                                                            |
| Greece  | Any medical doctor                                                                                                                         | Any medical doctor                                                                                                                                                                                                          | Yes | No                                         | Clinical practice breadth specialties best for of                   | Variable; typically pre-test | Possible | Used sparingly                                                    | Inconsistent and insufficient reimbursement of both counselling and testing                                                            |
| Hungary | Clinical geneticists (results cannot be withheld by any specialist, but genetic counselling can only be provided by a clinical geneticist) | Typically clinical geneticists, but possible by any specialist medical doctor in cases of urgency or common indications covered by their fields of expertise (with access to a clinical genetics consultation at all times) | Yes | No                                         | National legislation; national directive on genetic counselling(58) | Mandatory pre- & post-test   | Possible | Used sparingly, <10% of all counselling; upon request of counslee | Insurance only reimburses 1 test/consultation per patient per year and only selected tests                                             |

|            |                                                                                                                                         |                                                                                               |                                           |                                            |                                                           |      |                            |              |                                                 |                                                                                                                                                                                                                  |
|------------|-----------------------------------------------------------------------------------------------------------------------------------------|-----------------------------------------------------------------------------------------------|-------------------------------------------|--------------------------------------------|-----------------------------------------------------------|------|----------------------------|--------------|-------------------------------------------------|------------------------------------------------------------------------------------------------------------------------------------------------------------------------------------------------------------------|
| Ireland    | If known diagnosis, typically genetic counsellors; if unknown diagnosis, typically clinical geneticists; also open to other specialties | Any medical doctor ( <i>but currently limited to certain hospitals</i> )                      | Yes                                       | No ( <i>but working in health system</i> ) | Clinical practice                                         | best | Typically pre- & post-test | Possible     | Somewhat frequent                               | Dedicated budget for genetic testing ( <i>and associated counselling</i> ) only at one hospital; testing at other hospitals must be sourced from general hospital budget                                         |
| Italy      | Clinical geneticists, oncologists; in specific circumstances laboratory scientists with medical genetics specialization                 | Clinical geneticists, oncologists                                                             | Yes                                       | No                                         | National regulation                                       |      | Mandatory pre- & post-test | Possible     | Minority of consults                            | None                                                                                                                                                                                                             |
| Latvia     | Medical geneticists                                                                                                                     | Single mutation diagnostics: 14 specialties; WES: Medical geneticists & pediatric oncologists | Yes                                       | No                                         | Clinical practice                                         | best | Mandatory pre- & post-test | Possible     | Used sparingly to deliver negative test results | Counselling restricted by available funds for genetic testing                                                                                                                                                    |
| Lithuania  | Clinical geneticists; OBGYN for pre-natal testing                                                                                       | Clinical geneticists                                                                          | Yes                                       | No                                         | Clinical practice                                         | best | Typically Pre & post-test  | Possible     | Approx. 60% of all counselling                  | None                                                                                                                                                                                                             |
| Luxembourg | Clinical geneticists                                                                                                                    | Clinical geneticists/ any medical doctor for tests related to his/her field                   | Yes ( <i>but no in-country training</i> ) | No                                         | National legislation for reimbursement; clinical practice | best | Typically pre- & post-test | Not possible | -                                               | Patients first must cover the bill and are then reimbursed by national insurance only 88% (100% for children <18 years); genetic counselling only reimbursed when prescribed by specialized medical doctors, not |

|             |                                                                                                     |                                                                                          |     |                                             |                                                                                                                   |                            |          |                      |                                                                                                             |  |                                                          |
|-------------|-----------------------------------------------------------------------------------------------------|------------------------------------------------------------------------------------------|-----|---------------------------------------------|-------------------------------------------------------------------------------------------------------------------|----------------------------|----------|----------------------|-------------------------------------------------------------------------------------------------------------|--|----------------------------------------------------------|
|             |                                                                                                     |                                                                                          |     |                                             |                                                                                                                   |                            |          |                      |                                                                                                             |  | generalists; no reimbursement of telemedical counselling |
| Malta       | Primarily clinical geneticists; also 'genomic care coordinators' (analogous to genetic counsellors) | Primarily clinical geneticists                                                           | Yes | No (but process for recognition ongoing)    | Clinical best practice                                                                                            | Typically pre- & post-test | Possible | Rather frequent      | None                                                                                                        |  |                                                          |
| Netherlands | Clinical geneticists; also specifically trained specialist nurses and physician assistants          | Clinical geneticists and specifically trained specialist nurses and physician assistants | Yes | No                                          | Standard operating procedures in each clinical genetics center*                                                   | Mandatory pre- & post-test | Possible | Rather frequent      | None for clinicians; patients may first have to cover annual excess (up to 385 EUR) before insurance active |  |                                                          |
| Poland      | Primarily clinical geneticists; open to all physicians                                              | Any medical doctor                                                                       | Yes | No (but planned in upcoming legislation)    | Clinical best practice                                                                                            | Typically pre- & post-test | Possible | Minority of consults | None                                                                                                        |  |                                                          |
| Portugal    | Any medical doctor                                                                                  | Predictive – only medical geneticists; otherwise any medical doctor                      | Yes | No (exist but not recognized or integrated) | National protocol for pre-symptomatic testing for incurable late-onset diseases; otherwise clinical best practice | Variable                   | Possible | Minority of consults | None                                                                                                        |  |                                                          |
| Romania     | Clinical geneticists                                                                                | Clinical geneticists                                                                     | Yes | No                                          | Clinical best practice                                                                                            | Typically pre- & post-test | Possible | Minority of consults | Genetic counselling covered by insurance, but genetic testing reimbursed by                                 |  |                                                          |

|          |                                                                                                                                                   |                                                                                                   |     |                                                           |                                              |                            |          |                      |  |                                                                                                  |
|----------|---------------------------------------------------------------------------------------------------------------------------------------------------|---------------------------------------------------------------------------------------------------|-----|-----------------------------------------------------------|----------------------------------------------|----------------------------|----------|----------------------|--|--------------------------------------------------------------------------------------------------|
|          |                                                                                                                                                   |                                                                                                   |     |                                                           |                                              |                            |          |                      |  | mosaic of health ministry and private funding                                                    |
| Slovakia | Medical geneticists                                                                                                                               | Medical geneticists                                                                               | Yes | No                                                        | National regulation; clinical practice best  | Typically pre- & post-test | Possible | Used sparingly       |  | None for Dept. of Medical Genetics, but reduced for telemedicine                                 |
| Slovenia | Mainly clinical geneticists; ‘genetic nurses’ (nurse with additional genetics training) also included; possible by any medical doctor             | Open to all specialties; mainly clinical geneticists                                              | Yes | No                                                        | Local standard operating procedures          | Mandatory pre- & post-test | Possible | Used sparingly       |  | None                                                                                             |
| Spain    | Specialist medical doctor, mainly medical oncologists/gastroenterologists for hereditary cancer; in Catalonia, genetic counsellors ‘unofficially’ | Open to all specialties; mainly medical oncologists and gastroenterologists for hereditary cancer | No  | No ( <i>practicing in Catalonia, but not recognized</i> ) | National legislation; clinical practice best | Mandatory pre- & post-test | Possible | Minority of consults |  | None                                                                                             |
| Sweden   | Any medical doctor can provide; medical geneticists/genetic counsellors provide for complex cases and in case of positive test results            | Any medical doctor                                                                                | Yes | No ( <i>practicing but not formally recognized</i> )      | Clinical practice best                       | Typically pre- & post-test | Possible | Frequently used      |  | Generally none, but can be some regional variation; reimbursement subject to regional agreements |

**Supplementary Table 5.** Overview of genetic counselling practice in EU Member States, as reported in interviews with national expert representatives from each country. ‘WGS’ = whole genome sequencing. ‘WES’ = whole exome sequencing. ‘Medical geneticists’ and ‘clinical geneticists’ are functionally equivalent labels given in different countries to describe physicians specialized in genetics. \* - includes 1) guidelines and 4-year education program to become a clinical geneticist after medical (MD) training; 2) guidelines for specific genetic conditions; and 3) guidelines for mainstreaming.
